# Supplementary material
Source: PubMed Central journal article supplement (PMC6832047)

*Supplemental material is neither peer-reviewed nor thoroughly edited by CJASN. The authors alone are responsible for the accuracy and presentation of the material.*

### **Supplemental Material Table of Contents**

Supplemental Figure 1. Time trends in the percentage of women among incident and prevalent kidney replacement therapy populations, compared with the general population, by age group.

Supplemental Figure 2. Sex-specific time trends in kidney replacement therapy incidence, by country and age group.

Supplemental Figure 3. Time trends in male-to-female ratios for kidney replacement therapy incidence, by country and age group.

# Supplemental Figure 2

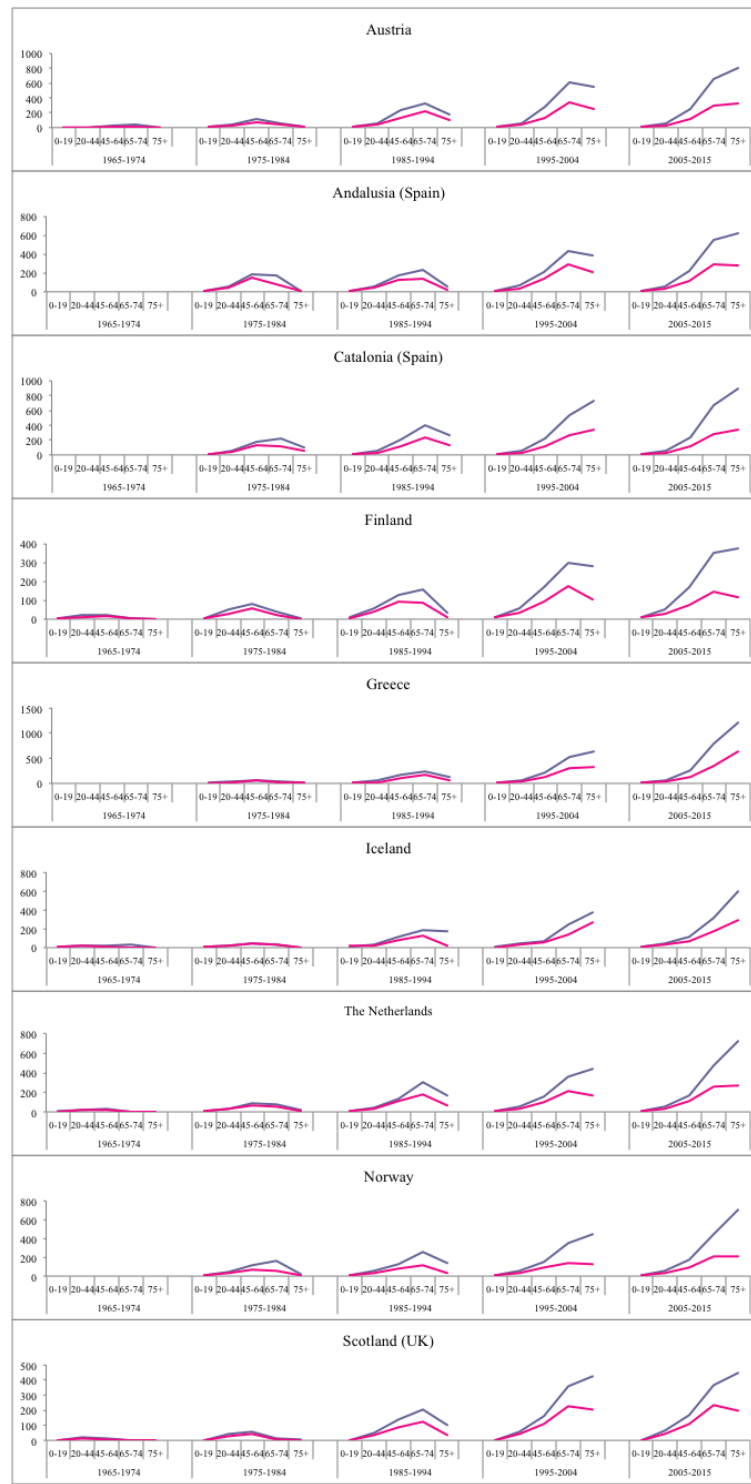

*Supplemental material is neither peer-reviewed nor thoroughly edited by CJASN. The authors alone are responsible for the accuracy and presentation of the material.*

# Supplemental Figure 3

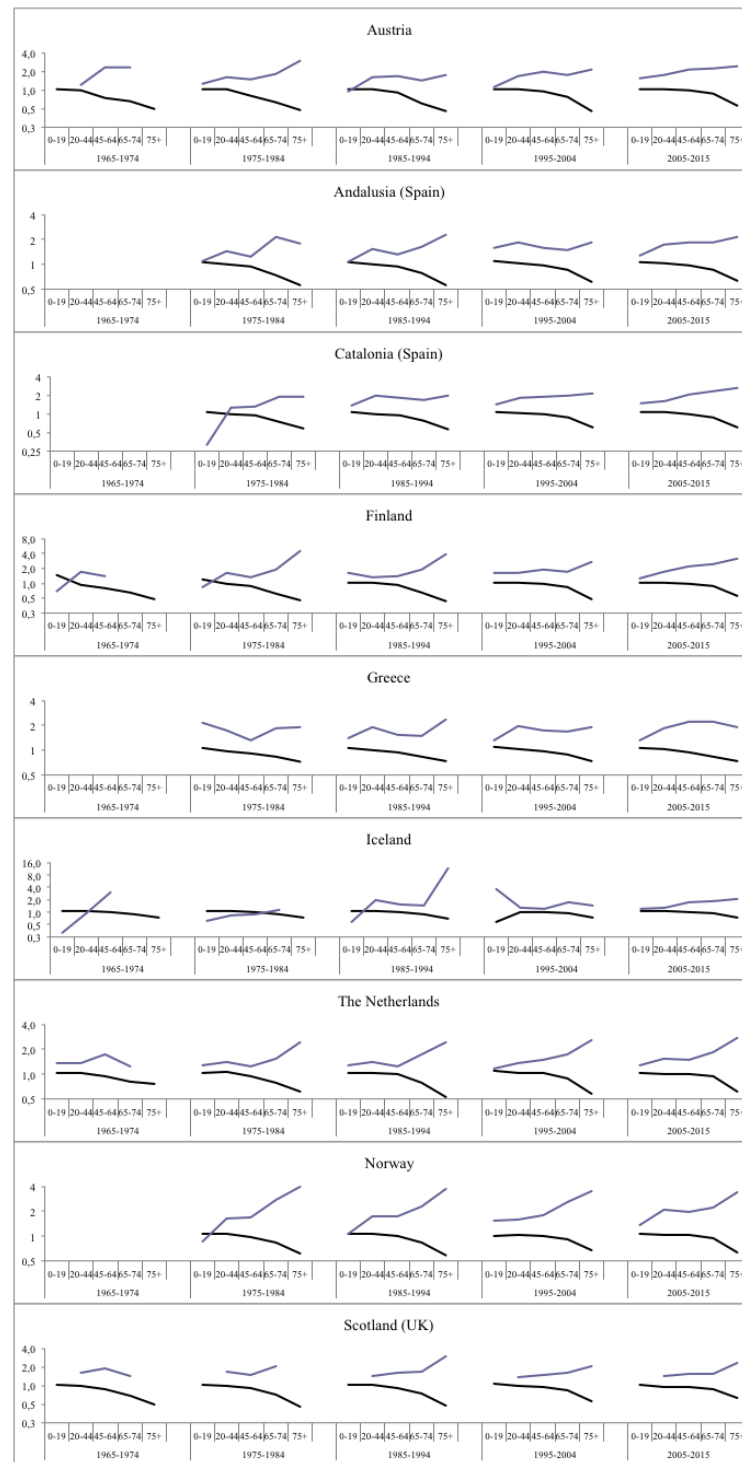

*Supplemental material is neither peer-reviewed nor thoroughly edited by CJASN. The authors alone are responsible for the accuracy and presentation of the material.*

# Supplemental Figure 1a

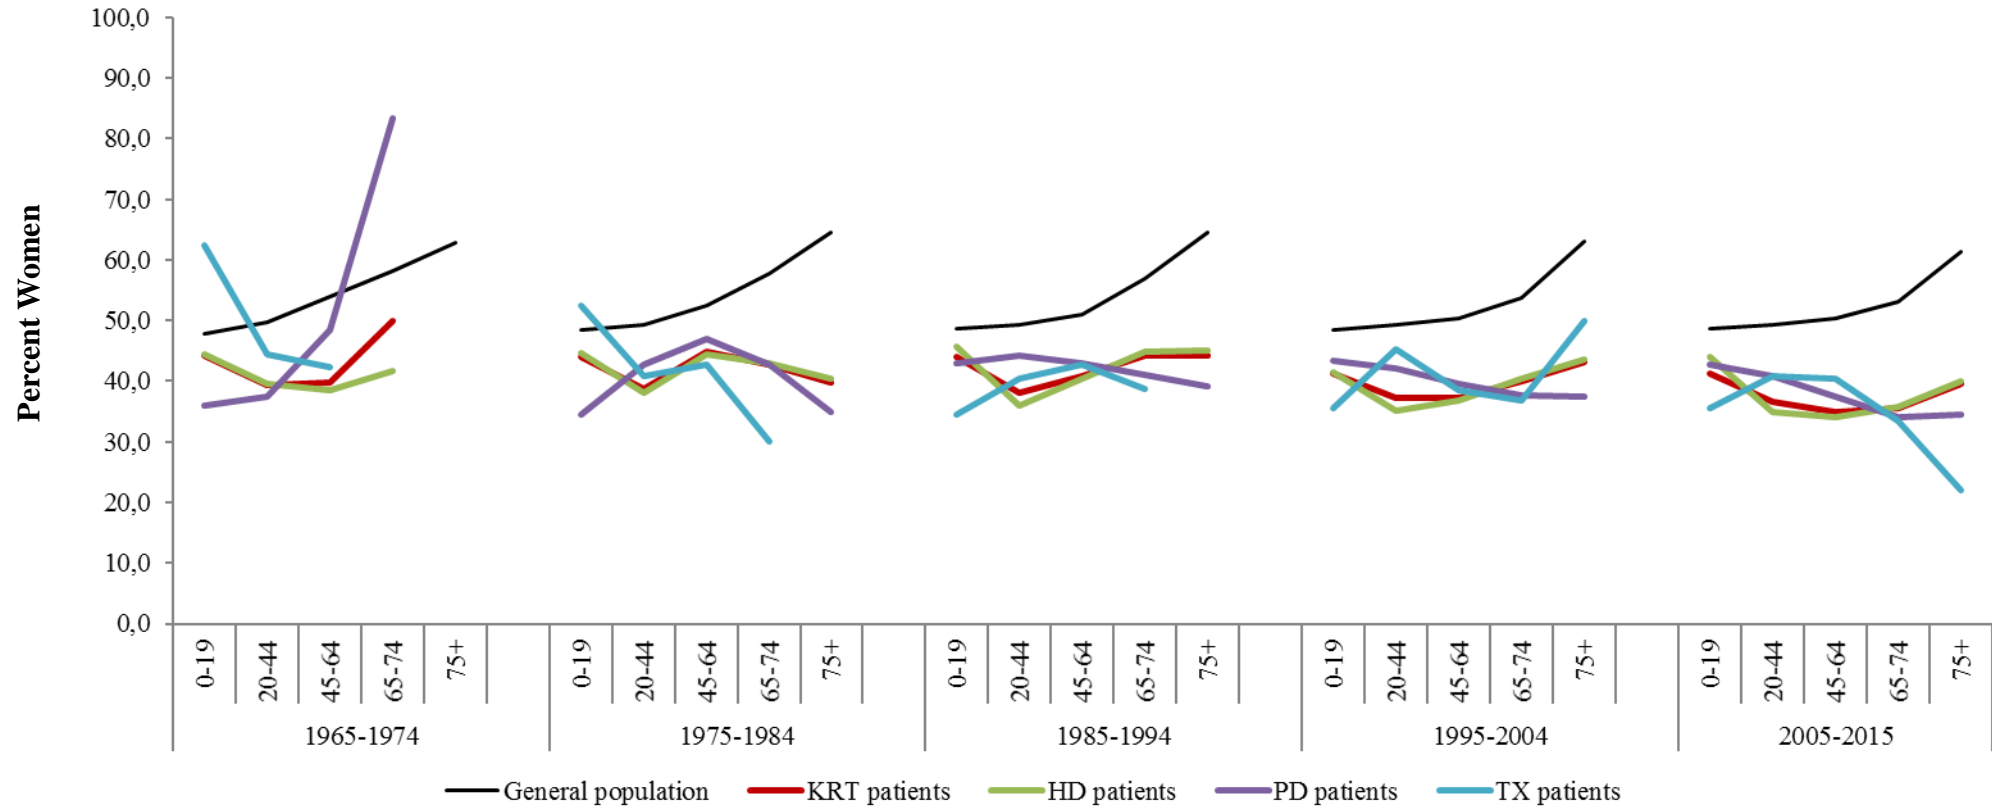

# Supplemental Figure 1b

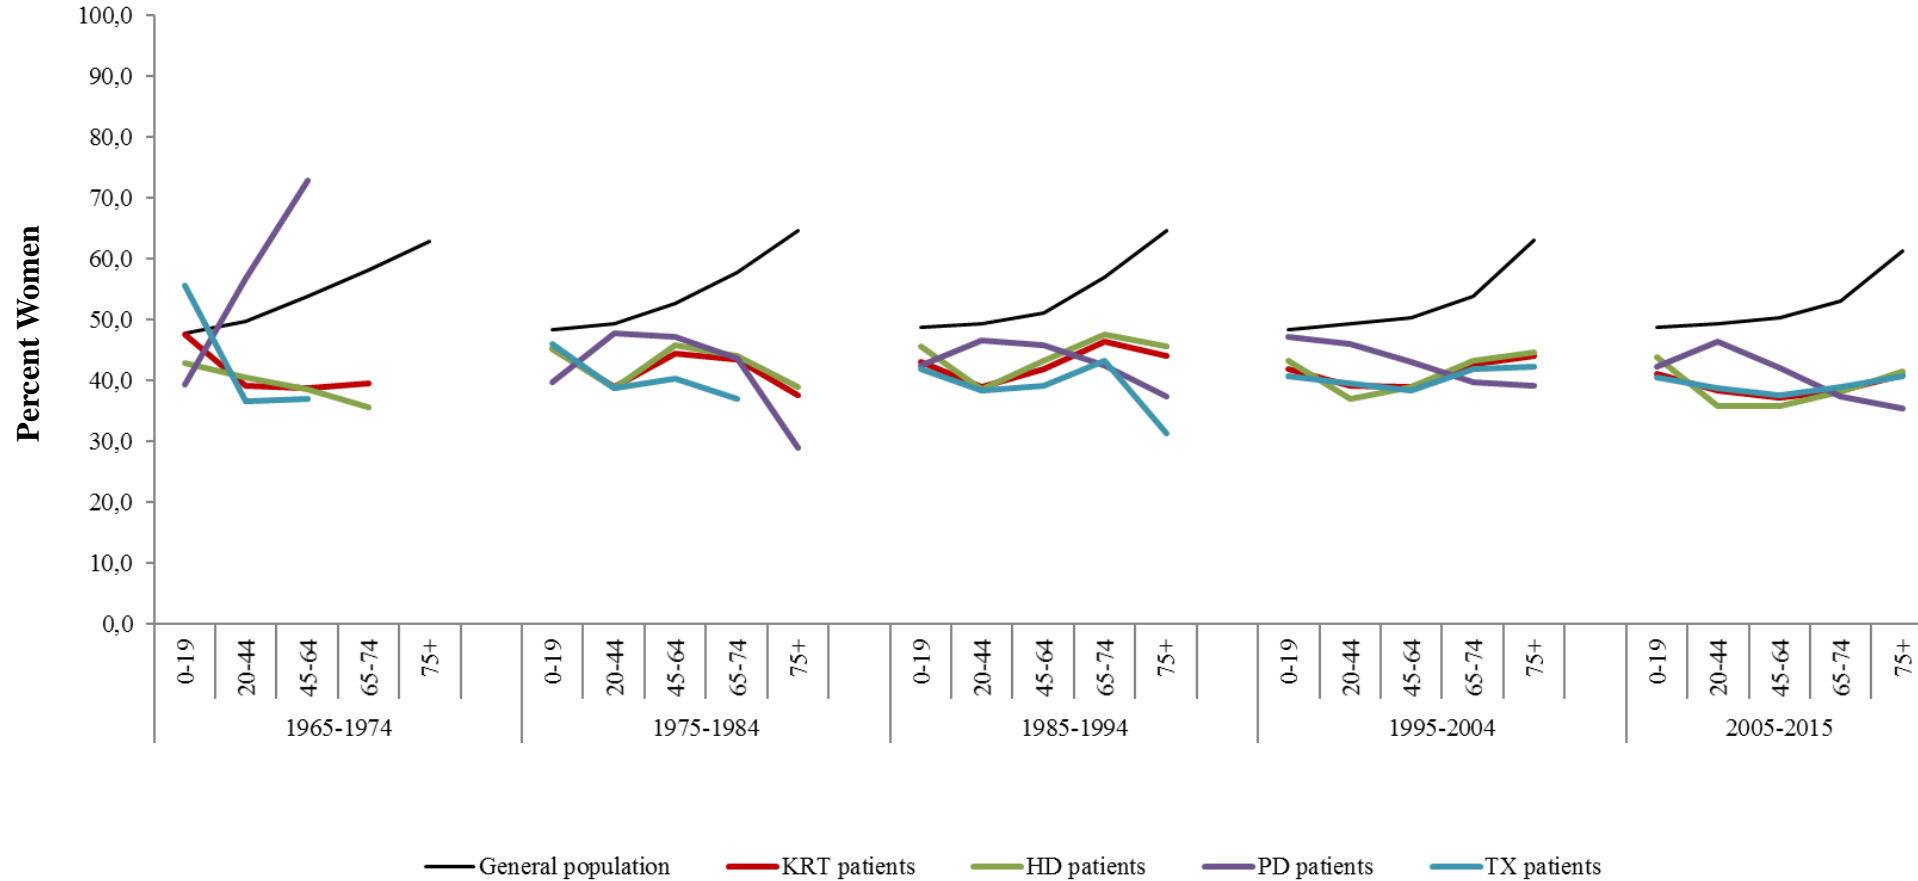

Supplement: CJN.04400419SupplementaryData.pdf [file CJN.04400419SupplementaryData.pdf]
